# Supplementary material for: Syringe-push membrane absorption as a simple rapid method of urine preparation for clinical proteomics
Source: PubMed Central journal article supplement (PMC4464716; doi:10.1186/s12014-015-9087-4), 2015-06-06
Supplement: 12014_2015_9087_MOESM1_ESM.pdf [file 12014_2015_9087_MOESM1_ESM.pdf]

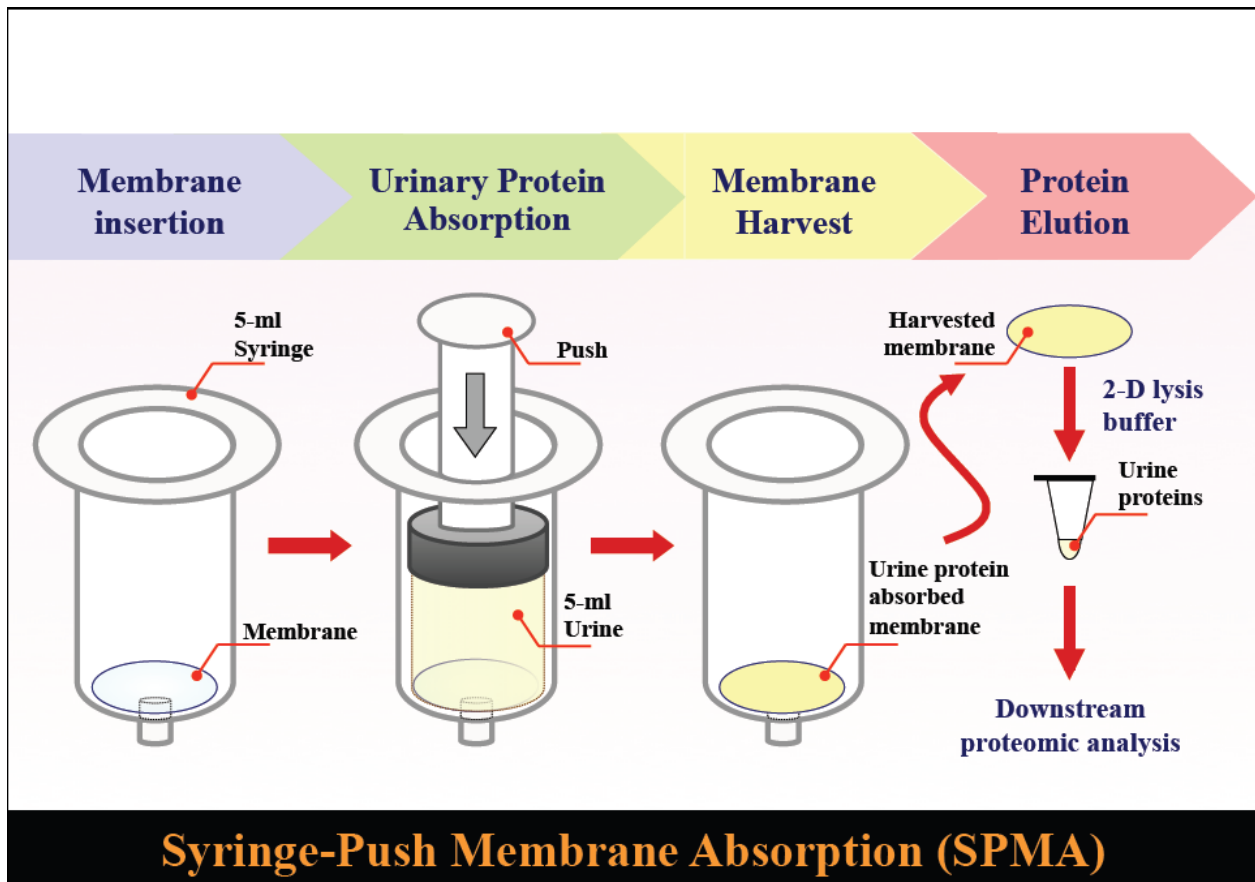

Supplementary figure 1
